# Supplementary material for: All-trans retinoic acid improves NSD2-mediated RARα phase separation and efficacy of anti-CD38 CAR T-cell therapy in multiple myeloma
Source: PubMed Central journal article supplement — J Immunother Cancer. 2023 Mar 14;11(3):e006325. doi: 10.1136/jitc-2022-006325 (PMC10016253; doi:10.1136/jitc-2022-006325), 2023-03-14
Supplement: jitc-2022-006325supp001.pdf [file jitc-2022-006325supp001.pdf]

## Supplementary materials

## Key resources of this study

| Category                                              | Source                    | Identifier |
|-------------------------------------------------------|---------------------------|------------|
| <b>Antibodies and ELISA kits</b>                      |                           |            |
| PE Mouse IgG1, $\kappa$ Isotype Ctrl Antibody         | Biolegend                 | 400112     |
| PE anti-human CD138 (Syndecan-1) Antibody             | Biolegend                 | 352306     |
| PE anti-human CD38                                    | Biolegend                 | 356603     |
| PE anti-human CD269 (BCMA) Antibody                   | Biolegend                 | 357504     |
| PE anti-human CD319 (CRACC/SLAMF7) Antibody           | Biolegend                 | 331806     |
| PerCP anti-human CD3 Antibody                         | Biolegend                 | 300428     |
| APC anti-human IFN $\gamma$                           | Biolegend                 | 502512     |
| FITC anti-human TNF- $\alpha$                         | Biolegend                 | 502906     |
| RAR $\alpha$ Rabbit mAb                               | Abclonal                  | A19551     |
| RAR $\beta$ Rabbit mAb                                | Abclonal                  | A4535      |
| CD38 Rabbit pAb                                       | Abclonal                  | A13611     |
| WHSC1/NSD2 Rabbit pAb                                 | Abclonal                  | A7938      |
| Anti-WHSC1/NSD2 antibody [29D1] - ChIP Grade          | abcam                     | ab75359    |
| Anti-Histone H3 (di methyl K36) antibody - ChIP Grade | abcam                     | ab9049     |
| HA-Tag (C29F4) Rabbit mAb                             | Cell Signaling Technology | 3724S      |
| RAR $\alpha$ (E6Z6K) Rabbit mAb                       | Cell Signaling Technology | 62294S     |
| Anti-mouse GAPDH                                      | UTIBODY                   | UM4002     |
| ANTI-FLAG $\text{®}$ M2-Peroxidase                    | Sigma-Aldrich             | A8592      |
| Goat Anti-Rabbit IgG-HRP                              | Sigma-Aldrich             | A0545      |
| Rabbit Anti Mouse IgG-HRP                             | Sigma-Aldrich             | A9044-2ML  |
| Anti-rabbit IgG                                       | Proteintech               | 30000-0    |

|                                               |                          |             |
|-----------------------------------------------|--------------------------|-------------|
| Anti-mouse IgG                                | Proteintech              | B900620     |
| ELISA MAX™ Deluxe Set Human IFN- $\gamma$     | Biolegend                | 430104      |
| ELISA MAX™ Deluxe Set Human TNF- $\alpha$     | Biolegend                | 430204      |
| <b>Chemicals, Reagent and Drugs</b>           |                          |             |
| FLAG Peptide                                  | Sigma-Aldrich            | F3290       |
| Puromycin 2HCL                                | SelleckChem              | S7417       |
| Cycloheximide                                 | Sigma-Aldrich            | C7698       |
| Polyethyleneimine (PEI)                       | Polysciences             | 23966-1     |
| Poly (ethylene glycol) 8000 (PEG8000)         | Sigma-Aldrich            | 25322-68-3  |
| Polybrene                                     | Sigma-Aldrich            | 107689      |
| Pierce™ Protein A/G Magnetic Beads            | Thermo Fisher Scientific | 88802       |
| Pierce™ Glutathione Agarose                   | Thermo Fisher Scientific | 16100       |
| Pierce™ HRV 3C Protease                       | Thermo Fisher Scientific | 88946       |
| ChIP-grade Protein A/G Magnetic Beads         | Thermo Fisher Scientific | 26162       |
| 2-Methyl-2-butanol                            | Sigma-Aldrich            | 240486      |
| 2,2,2-Tribromoethanol                         | Sigma-Aldrich            | T48402      |
| CellTrace™ Far Red                            | Thermo Fisher Scientific | C34564      |
| Luciferase assay Kit                          | Promega                  | E1910       |
| Phosphatase Inhibitor Cocktail(100 $\times$ ) | Cell Signaling           | 5870S       |
| Ficoll-Paque PLUS endotoxin tested            | GE Healthcare            | 17-1440-02  |
| Human CD138 MicroBeads                        | Miltenyi Biotec          | 130-105-961 |
| NuPAGE 4-12% Bis-Tris Gel                     | Invitrogen               | NP0335BOX   |
| All-trans-retinoic acid (ATRA)                | Sigma-Aldrich            | R2625       |
| <b>Enzymes</b>                                |                          |             |
| RNase A, DNase and protease-free              | Thermo Fisher            | EN0531      |
| Proteinase K Solution, ChIP grade             | Thermo Fisher            | 26160       |

|                             |                         |             |
|-----------------------------|-------------------------|-------------|
| EcoRI                       | NewEngland Biolabs      | R0101S      |
| KpnI-HF                     | NewEngland Biolabs      | R3142S      |
| HindIII                     | NewEngland Biolabs      | R104S       |
| AgeI-HF                     | NewEngland Biolabs      | R3552S      |
| CutSmart Buffer             | NewEngland Biolabs      | 137204S     |
| T4 DNA Ligase               | NewEngland Biolabs      | M0202S      |
| 10×Buffer for T4 DNA ligase | NewEngland Biolabs      | B0202S      |
| dNTP mix                    | ABI                     | 362275      |
| 5×All-In-One RT MasterMix   | abm                     | G592        |
| EvaGreen 2X qPCR MasterMix  | ABI                     | MasterMix-R |
| <b>Primers sequence</b>     |                         |             |
| HumanGAPDH-F                | TTGCCCTCAACGACCACTTT    |             |
| HumanGAPDH-R                | TGGTCCAGGGGTCTTACTCC    |             |
| HumanCD38-F                 | AGACTGCCAAAGTGTATGGGA   |             |
| HumanCD38-R                 | GCAAGGTACGGTCTGAGTTCC   |             |
| HumanNSD2-F                 | ACCGCGAGTGTTCTGTGTTTC   |             |
| HumanNSD2-R                 | GTCGTGGCCGTAAACTTCTG    |             |
| HumanTNFRSF17-F             | ACCTTGCAACTTCGATGTTCTT  |             |
| HumanTNFRSF17-R             | CAGAGAATCGCATTCGTTCCCTT |             |
| HumanSDC1-F                 | ACGGCTATTCCCACGTCTC     |             |
| HumanSDC1-R                 | TCTGGCAGGACTACAGCCTC    |             |
| HumanSLAMF7-F               | TCAGGGATCTACTATGTGGGGA  |             |
| HumanSLAMF7-R               | GGTGCCATTCTTATTGCTCTGC  |             |
| HumanRARA-F                 | GGGCAAATACACTACGAACAACA |             |
| HumanRARA-R                 | CTCCACAGTCTTAATGATGCACT |             |

|               |                          |
|---------------|--------------------------|
| HumanRARB-F   | TCCGAAAAGCTCACCAGGAAA    |
| HumanRARB-R   | GGCCAGTTCACTGAATTTGTCC   |
| HumanRARG-F   | GGTACCAAGTGCATCATCAA     |
| HumanRARG-R   | TGTGCAGATACGCAGCATCAG    |
| HumanRXRA-F   | ATGGACACCAAACATTTCTGC    |
| HumanRXRA-R   | GGGAGCTGATGACCGAGAAAAG   |
| HumanRXRB-F   | ACGGCTATGTGCAATCTGC      |
| HumanRXRB-R   | CGGATGGTGCGTTTGAAGAA     |
| HumanRXRG-F   | AGAGGACGATAAGGAAGGACC    |
| HumanRXRG-R   | CCATGACAAGGCACTTCTGAT    |
| HumanCD38-1-F | CATTTTCAAAAATCTATCCATCTG |
| HumanCD38-1-R | TTTGCCCACTTTTAAATGGGGTT  |
| HumanCD38-2-F | TAGCCAACAAACATATGAAAA    |
| HumanCD38-2-R | TTAATGATCACCATTCTGACT    |
| HumanCD38-3-F | TACAATTGGCCTCCTTGCTGCTCT |
| HumanCD38-3-R | GCAGAGACCTAAGTAATGTGAGC  |
| HumanCD38-4-F | TACTGTCTGCCCCCTTAGGAC    |
| HumanCD38-4-R | TCCGTGGCTGGTTACACCAAT    |
| HumanCD38-5-F | AGATGCAGGGTGTGCTGACATT   |
| HumanCD38-5-R | GCAAACCACTTAAGTGTCTCTG   |
