# Supplementary material for: All-trans retinoic acid improves NSD2-mediated RARα phase separation and efficacy of anti-CD38 CAR T-cell therapy in multiple myeloma
Source: PubMed Central journal article supplement — J Immunother Cancer. 2023 Mar 14;11(3):e006325. doi: 10.1136/jitc-2022-006325 (PMC10016253; doi:10.1136/jitc-2022-006325), 2023-03-14
Supplement: jitc-2022-006325supp002.pdf [file jitc-2022-006325supp002.pdf]

## Supplementary Figures and Legends

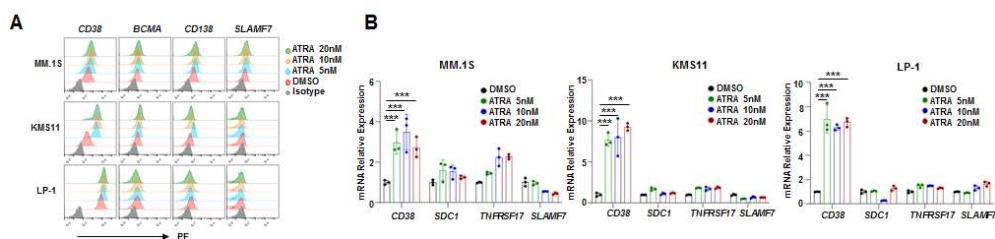

**Fig. S1 ATRA induced CD38 upregulation on MM cells.**

(A) Flow cytometry histograms representing cell surface expression of CD38, BCMA, CD138 and SLAMF7 on MM.1S, KMS11 and LP-1 MM cells before and after 5nM, 10nM and 20nM ATRA treatment for 24h. (B) qPCR shows *CD38*, *SDC1*, *TNFRSF17* and *SLAMF7* expression in MM.1S, KMS11 and LP-1 MM cells treated with increasing concentrations of ATRA for 24 h. All data represent results from at least three independent experiments, Two-sided *P*-values were determined by Student's *t* test; mean  $\pm$  s.d.

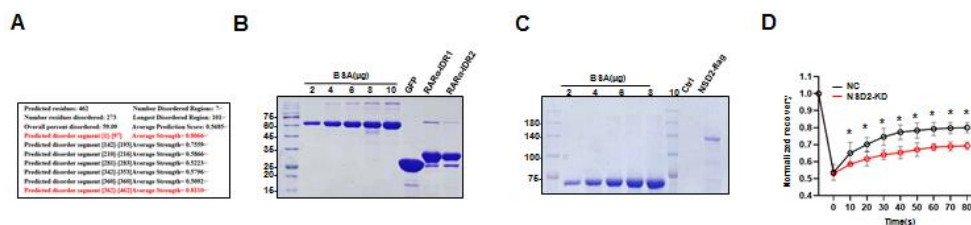

**Fig. S2 NSD2 enhances RAR $\alpha$  liquid-liquid phase separation in MM cells**

(A) Prediction of intrinsically disordered regions (IDRs) sites (red font) of RAR $\alpha$  protein using PONDR algorithms. (B) The purified GFP-fusion RAR $\alpha$ -IDR proteins detected by Coomassie brilliant blue staining. (C) The purified NSD2 protein detected by Coomassie brilliant blue staining. (D) Kinetic recovery times of bleached GFP-fusion RAR $\alpha$  droplet foci in HEK293T co-transfected with sgRNA (NSD2 KD) by 488 nm laser ( $n=3$  biologically independent experiments).

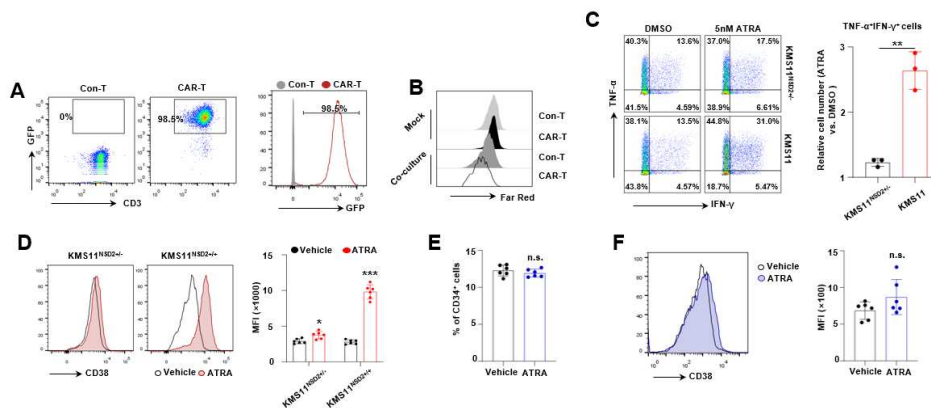

**Fig. S3 ATRA improves response to CD38 CAR-T in NSD2<sup>high</sup> MM cells**

(A) Purified CD38 CAR-T cells by Fluorescence Activating Cell Sorting (FACS), and flow cytometry detected CAR-T purity. (B) Con-T and CAR-T cells stained with Far Red and co-cultured in the presence or absence of MM cells after 24h. (C) Flow cytometry histograms representing cell expression of IFN- $\gamma$  and TNF- $\alpha$  in CAR-T cells which co-culture with KMS11<sup>NSD2+/+</sup> or KMS11<sup>NSD2-/-</sup> after ATRA treatment. (D) Flow cytometry histograms representing cell surface expression of CD38 on MM cells after ATRA injection. (E) Frequency of CD34<sup>+</sup> cells in BM cells. (F) Flow cytometry histograms representing cell surface expression of CD38 on CD34<sup>+</sup> cells after CAR-T and ATRA treatment. *P* values were determined by Pearson Coefficient and Log-ranks test. \**P* < 0.05, \*\**P* < 0.01, \*\*\**P* < 0.001. Two-sided *P* values were determined by Student's *t* test. Data indicate the mean  $\pm$  SD.
