# Supplementary figures and images for: All-trans retinoic acid improves NSD2-mediated RARα phase separation and efficacy of anti-CD38 CAR T-cell therapy in multiple myeloma
Source: PubMed Central journal article supplement — J Immunother Cancer. 2023 Mar 14;11(3):e006325. doi: 10.1136/jitc-2022-006325 (PMC10016253; doi:10.1136/jitc-2022-006325), 2023-03-14

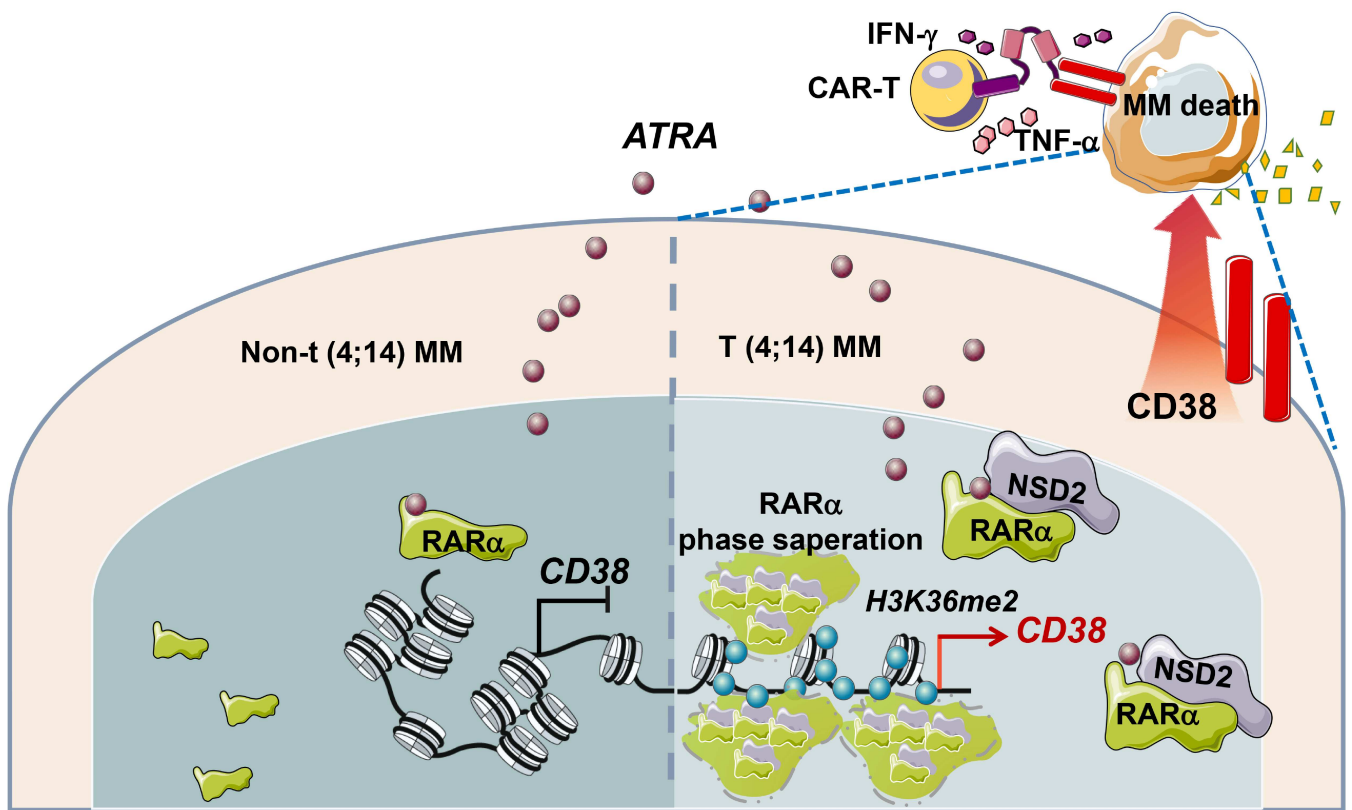

Supplement: jitc-2022-006325supp003.pdf [file jitc-2022-006325supp003.pdf]
